# Supplementary material for: Taxonomic Characterization and Secondary Metabolite Analysis of NEAU-wh3-1: An Embleya Strain with Antitumor and Antibacterial Activity
Source: PubMed Central journal article supplement (PMC7143961; doi:10.3390/microorganisms8030441), 2020-03-20
Supplement: microorganisms-08-00441-s001.pdf [file microorganisms-08-00441-s001.pdf]

# Taxonomic Characterization and Secondary Metabolite Analysis of NEAU-wh3-1: an *Embleya* strain with Antitumor and Antibacterial Activity

Han Wang <sup>1,†</sup>, Tianyu Sun <sup>1,†</sup>, Wenshuai Song<sup>1</sup>, Xiaowei Guo <sup>1</sup>, Peng Cao <sup>1</sup>, Xi Xu <sup>1</sup>, Yue Shen <sup>1,2\*</sup>, Junwei Zhao <sup>1,\*</sup>

<sup>1</sup> Key Laboratory of Agricultural Microbiology of Heilongjiang Province, Northeast Agricultural University, No. 600 Changjiang Road, Xiangfang District, Harbin 150030, China; wanghan507555536@gmail.com (H.W.); sty1561214024@163.com (T.S.); wenshuaisong@163.com (W.S.); guoweizi@hotmail.com (X.G.); cp511@126.com (P.C.); xuxi1758899581@126.com

<sup>2</sup> College of Science, Northeast Agricultural University, No. 600 Changjiang Road, Xiangfang District, Harbin 150030, China

\* Correspondence: shenyuelele@163.com (Y.S.); guyan2080@126.com (J.Z.)

† These authors contributed equally to this work.

**Table S1.** GenBank accession numbers of the sequences used in MLSA.

| Strain                                                  | Type strain                | Whole genome | <i>atpD</i> | <i>gyrB</i> | <i>recA</i> | <i>rpoB</i> | <i>trpB</i> |
|---------------------------------------------------------|----------------------------|--------------|-------------|-------------|-------------|-------------|-------------|
| <i>Streptomyces radiciphilus</i>                        | NEAU-wh3-1                 | –            | MT039411    | MT039412    | MT039413    | MT039414    | MT039415    |
| <i>Streptomyces hyalinus</i>                            | MB891-A1 <sup>T</sup>      | BIFH01000000 | –           | –           | –           | –           | –           |
| <i>Embleya scabrispora</i>                              | DSM 41855 <sup>T</sup>     | MWQN00000000 | –           | –           | –           | –           | –           |
| <i>Streptomyces qinglanensis</i>                        | 172205 <sup>T</sup>        | LJGV01000022 | –           | –           | –           | –           | –           |
| <i>Streptomyces glebosus</i>                            | CGMCC 4.1873 <sup>T</sup>  | BLIO00000000 | –           | –           | –           | –           | –           |
| <i>Streptomyces durbertensis</i>                        | NEAU-S1GS20 <sup>T</sup>   | –            | MH534864    | MH534865    | MH534866    | MH534867    | MH534868    |
| <i>Streptomyces ramulosus</i>                           | NRRL B-2714 <sup>T</sup>   | –            | MF581785    | MF188173    | MF581787    | MF581789    | MF581783    |
| <i>Streptomyces barkulensis</i>                         | RC 1831 <sup>T</sup>       | PGSG00000000 | –           | –           | –           | –           | –           |
| <i>Streptacidiphilus bronchialis</i>                    | DSM 106435 <sup>T</sup>    | CP031264     | –           | –           | –           | –           | –           |
| <i>Kitasatospora xanthocidica</i>                       | NBRC 13469 <sup>T</sup>    | QVIG00000000 | –           | –           | –           | –           | –           |
| <i>Streptomyces griseoplanus</i>                        | NRRL B-3064 <sup>T</sup>   | LIQR00000000 | KT384582    | KT384931    | JQ806239    | JQ806243    | JQ806247    |
| <i>Streptomyces cattleya</i>                            | NRRL 8057 <sup>T</sup>     | JWDF00000000 | KT384775    | KT385123    | KT385477    | KT389095    | KT389444    |
| <i>Streptomyces rubrisoli</i>                           | FXJ1.725 <sup>T</sup>      | –            | KC137297    | KC137293    | KC137289    | KC137285    | KC137281    |
| <i>Streptomyces rubidus</i>                             | 13C15 <sup>T</sup>         | MDCQ00000000 | KT384713    | KT385063    | KT385414    | KT389034    | KT389382    |
| <i>Streptomyces niger</i>                               | NBRC 13362 <sup>T</sup>    | JOFQ00000000 | FJ406130    | FJ406186    | FJ406242    | FJ406298    | FJ406353    |
| <i>Streptomyces sparsogenes</i>                         | ATCC 25498 <sup>T</sup>    | ASQP00000000 | KT384724    | KT385073    | KT385425    | DQ241995    | KT389393    |
| <i>Streptomyces hiroshimensis</i>                       | NBRC 3839 <sup>T</sup>     | –            | KT384596    | KT384945    | KT385294    | AY280780    | KT389265    |
| <i>Streptomyces mobaraensis</i>                         | NBRC 13819 <sup>T</sup>    | VOKX00000000 | KT384648    | KT384997    | KT385348    | KT388968    | KT389317    |
| <i>Streptomyces abikoensis</i>                          | NBRC 13860 <sup>T</sup>    | –            | FJ406150    | FJ406206    | FJ406262    | FJ406318    | FJ406373    |
| <i>Streptomyces sclerotialis</i>                        | NRRL ISP-5269 <sup>T</sup> | JOBC00000000 | FJ406181    | FJ406237    | FJ406293    | FJ406348    | FJ406404    |
| <i>Streptomyces pratens</i>                             | BK 138 <sup>T</sup>        | –            | KP890254    | KP890257    | KP890260    | KP890263    | KP890266    |
| <i>Streptomyces monomycini</i>                          | NRRL B-24309 <sup>T</sup>  | JNYL00000000 | FJ406180    | KT384998    | KT385349    | FJ406347    | FJ406403    |
| <i>Streptomyces rimosus</i> subsp. <i>rimosus</i>       | ATCC 10970 <sup>T</sup>    | LGCS00000000 | FJ406141    | FJ406197    | FJ406253    | KJ996628    | FJ406364    |
| <i>Streptomyces olivaceiscleroticus</i>                 | DSM 40595 <sup>T</sup>     | –            | FJ406164    | FJ406220    | FJ406276    | FJ406332    | FJ406387    |
| <i>Streptomyces catenulae</i>                           | NRRL B-2342 <sup>T</sup>   | JODY00000000 | FJ406152    | FJ406208    | FJ406264    | KJ996525    | FJ406375    |
| <i>Streptomyces sioyaensis</i>                          | NRRL B-5408 <sup>T</sup>   | SDIF00000000 | MG881213    | FJ406188    | MG881215    | MG881217    | MG881219    |
| <i>Streptomyces decoyicus</i>                           | NRRL 2666 <sup>T</sup>     | LGUU00000000 | FJ406159    | FJ406215    | FJ406271    | FJ406327    | FJ406382    |
| <i>Streptomyces caniferus</i>                           | NBRC 15389 <sup>T</sup>    | BLIN00000000 | KT384499    | KT384848    | KT385196    | KT388818    | KT389168    |
| <i>Streptomyces libani</i> subsp. <i>rufus</i>          | LMG 20087 <sup>T</sup>     | BLIQ00000000 | FJ406165    | FJ406221    | FJ406277    | FJ406333    | FJ406388    |
| <i>Streptomyces hygrosopicus</i> subsp. <i>glebosus</i> | NBRC 13786 <sup>T</sup>    | –            | FJ406158    | FJ406214    | FJ406270    | FJ406326    | FJ406381    |
| <i>Streptomyces platensis</i>                           | JCM 4662 <sup>T</sup>      | MIGA00000000 | GU383329    | FJ406219    | KJ469294    | GU383753    | KT389356    |

**Table S2.** MLSA distance values for selected strains in this study.

Strains: 1, NEAU-wh3-1; 2, *Streptomyces platensis* JCM 4662<sup>T</sup>; 3, *Streptomyces hygrosopicus* subsp. *glebosus* NBRC 13786<sup>T</sup>; 4, *Streptomyces glebosus* CGMCC 4.1873<sup>T</sup>; 5, *Streptomyces libani* subsp. *rufus* LMG 20087<sup>T</sup>; 6, *Streptomyces ramulosus* NRRL B-2714<sup>T</sup>; 7, *Streptomyces caniferus* NBRC 15389<sup>T</sup>; 8, *Streptomyces decoyicus* NRRL 2666<sup>T</sup>; 9, *Streptomyces catenulae* NRRL B-2342<sup>T</sup>; 10, *Streptomyces sioyaensis* NRRL B-5408<sup>T</sup>; 11, *Streptomyces pratens* BK 138<sup>T</sup>; 12, *Streptomyces abikoensis* NBRC 13860<sup>T</sup>; 13, *Streptomyces hirosimensis* NBRC 3839<sup>T</sup>; 14, *Streptomyces sparsogenes* ATCC 25498<sup>T</sup>; 15, *Streptomyces mobaraensis* NBRC 13819<sup>T</sup>; 16, *Streptomyces rimosus* subsp. *rimosus* ATCC 10970<sup>T</sup>; 17, *Streptomyces sclerotialis* NRRL ISP-5269<sup>T</sup>; 18, *Streptomyces monomycini* NRRL B-24309<sup>T</sup>; 19, *Streptomyces olivaceiscleroticus* DSM 40595<sup>T</sup>; 20, *Streptomyces niger* NBRC 13362<sup>T</sup>; 21, *Streptomyces durbertensis* NEAU-S1GS20<sup>T</sup>; 22, *Streptomyces rubrisoli* FXJ1.725<sup>T</sup>; 23, *Streptomyces qinglanensis* 172205<sup>T</sup>; 24, *Streptomyces rubidus* 13C15<sup>T</sup>; 25, *Kitasatospora xanthocidica* NBRC 13469<sup>T</sup>; 26, *Streptacidiphilus bronchialis* DSM 106435<sup>T</sup>; 27, *Streptomyces griseoplanus* NRRL B-3064<sup>T</sup>; 28, *Streptomyces cattleya* NRRL 8057<sup>T</sup>; 29, *Streptomyces barkulensis* RC 1831<sup>T</sup>; 30, *Embleya hyalina* MB891-A1<sup>T</sup>; 31, *Embleya scabrispora* DSM 41855<sup>T</sup>.

| Strain | MLSA (Kimura 2-parameter) distance |       |       |       |       |       |       |       |       |       |       |       |       |       |       |       |       |       |       |       |       |       |       |       |       |       |       |       |       |       |
|--------|------------------------------------|-------|-------|-------|-------|-------|-------|-------|-------|-------|-------|-------|-------|-------|-------|-------|-------|-------|-------|-------|-------|-------|-------|-------|-------|-------|-------|-------|-------|-------|
|        | 1                                  | 2     | 3     | 4     | 5     | 6     | 7     | 8     | 9     | 10    | 11    | 12    | 13    | 14    | 15    | 16    | 17    | 18    | 19    | 20    | 21    | 22    | 23    | 24    | 25    | 26    | 27    | 28    | 29    | 30    |
| 1      |                                    |       |       |       |       |       |       |       |       |       |       |       |       |       |       |       |       |       |       |       |       |       |       |       |       |       |       |       |       |       |
| 2      | 0.526                              |       |       |       |       |       |       |       |       |       |       |       |       |       |       |       |       |       |       |       |       |       |       |       |       |       |       |       |       |       |
| 3      | 0.472                              | 0.053 |       |       |       |       |       |       |       |       |       |       |       |       |       |       |       |       |       |       |       |       |       |       |       |       |       |       |       |       |
| 4      | 0.412                              | 0.558 | 0.490 |       |       |       |       |       |       |       |       |       |       |       |       |       |       |       |       |       |       |       |       |       |       |       |       |       |       |       |
| 5      | 0.481                              | 0.077 | 0.030 | 0.505 |       |       |       |       |       |       |       |       |       |       |       |       |       |       |       |       |       |       |       |       |       |       |       |       |       |       |
| 6      | 0.565                              | 0.389 | 0.369 | 0.670 | 0.370 |       |       |       |       |       |       |       |       |       |       |       |       |       |       |       |       |       |       |       |       |       |       |       |       |       |
| 7      | 0.464                              | 0.097 | 0.047 | 0.522 | 0.067 | 0.375 |       |       |       |       |       |       |       |       |       |       |       |       |       |       |       |       |       |       |       |       |       |       |       |       |
| 8      | 0.464                              | 0.085 | 0.040 | 0.522 | 0.061 | 0.375 | 0.043 |       |       |       |       |       |       |       |       |       |       |       |       |       |       |       |       |       |       |       |       |       |       |       |
| 9      | 0.470                              | 0.129 | 0.079 | 0.564 | 0.100 | 0.316 | 0.081 | 0.073 |       |       |       |       |       |       |       |       |       |       |       |       |       |       |       |       |       |       |       |       |       |       |
| 10     | 0.475                              | 0.112 | 0.063 | 0.533 | 0.087 | 0.371 | 0.064 | 0.067 | 0.088 |       |       |       |       |       |       |       |       |       |       |       |       |       |       |       |       |       |       |       |       |       |
| 11     | 0.477                              | 0.165 | 0.132 | 0.561 | 0.144 | 0.380 | 0.136 | 0.135 | 0.136 | 0.131 |       |       |       |       |       |       |       |       |       |       |       |       |       |       |       |       |       |       |       |       |
| 12     | 0.464                              | 0.168 | 0.129 | 0.574 | 0.126 | 0.365 | 0.115 | 0.126 | 0.106 | 0.123 | 0.138 |       |       |       |       |       |       |       |       |       |       |       |       |       |       |       |       |       |       |       |
| 13     | 0.513                              | 0.178 | 0.168 | 0.633 | 0.161 | 0.376 | 0.168 | 0.173 | 0.155 | 0.175 | 0.187 | 0.116 |       |       |       |       |       |       |       |       |       |       |       |       |       |       |       |       |       |       |
| 14     | 0.536                              | 0.204 | 0.193 | 0.673 | 0.180 | 0.416 | 0.183 | 0.195 | 0.203 | 0.197 | 0.215 | 0.170 | 0.109 |       |       |       |       |       |       |       |       |       |       |       |       |       |       |       |       |       |
| 15     | 0.458                              | 0.161 | 0.120 | 0.556 | 0.116 | 0.366 | 0.114 | 0.117 | 0.107 | 0.111 | 0.117 | 0.076 | 0.133 | 0.168 |       |       |       |       |       |       |       |       |       |       |       |       |       |       |       |       |
| 16     | 0.459                              | 0.135 | 0.096 | 0.554 | 0.116 | 0.352 | 0.092 | 0.087 | 0.081 | 0.104 | 0.123 | 0.120 | 0.168 | 0.188 | 0.117 |       |       |       |       |       |       |       |       |       |       |       |       |       |       |       |
| 17     | 0.475                              | 0.162 | 0.123 | 0.577 | 0.137 | 0.393 | 0.116 | 0.123 | 0.130 | 0.112 | 0.091 | 0.132 | 0.173 | 0.204 | 0.125 | 0.118 |       |       |       |       |       |       |       |       |       |       |       |       |       |       |
| 18     | 0.475                              | 0.133 | 0.097 | 0.560 | 0.117 | 0.352 | 0.094 | 0.089 | 0.087 | 0.105 | 0.131 | 0.118 | 0.171 | 0.183 | 0.121 | 0.026 | 0.128 |       |       |       |       |       |       |       |       |       |       |       |       |       |
| 19     | 0.456                              | 0.137 | 0.098 | 0.559 | 0.117 | 0.361 | 0.095 | 0.092 | 0.080 | 0.094 | 0.134 | 0.110 | 0.159 | 0.190 | 0.120 | 0.085 | 0.112 | 0.089 |       |       |       |       |       |       |       |       |       |       |       |       |
| 20     | 0.478                              | 0.180 | 0.144 | 0.581 | 0.146 | 0.395 | 0.138 | 0.146 | 0.150 | 0.142 | 0.158 | 0.135 | 0.185 | 0.207 | 0.124 | 0.141 | 0.155 | 0.144 | 0.153 |       |       |       |       |       |       |       |       |       |       |       |
| 21     | 0.508                              | 0.355 | 0.308 | 0.620 | 0.313 | 0.120 | 0.307 | 0.309 | 0.327 | 0.311 | 0.329 | 0.330 | 0.398 | 0.412 | 0.316 | 0.319 | 0.331 | 0.319 | 0.330 | 0.325 |       |       |       |       |       |       |       |       |       |       |
| 22     | 0.471                              | 0.180 | 0.139 | 0.587 | 0.132 | 0.400 | 0.129 | 0.135 | 0.138 | 0.139 | 0.147 | 0.114 | 0.176 | 0.188 | 0.118 | 0.135 | 0.153 | 0.141 | 0.133 | 0.125 | 0.349 |       |       |       |       |       |       |       |       |       |
| 23     | 0.640                              | 0.941 | 0.885 | 0.327 | 0.907 | 1.020 | 0.901 | 0.912 | 0.907 | 0.896 | 0.932 | 0.929 | 0.962 | 0.995 | 0.914 | 0.919 | 0.945 | 0.922 | 0.938 | 0.956 | 0.979 | 0.933 |       |       |       |       |       |       |       |       |
| 24     | 0.459                              | 0.179 | 0.145 | 0.570 | 0.144 | 0.381 | 0.135 | 0.143 | 0.136 | 0.140 | 0.134 | 0.118 | 0.165 | 0.196 | 0.107 | 0.129 | 0.141 | 0.128 | 0.142 | 0.118 | 0.321 | 0.131 | 0.927 |       |       |       |       |       |       |       |
| 25     | 0.715                              | 0.384 | 0.366 | 0.968 | 0.378 | 0.675 | 0.363 | 0.366 | 0.354 | 0.345 | 0.360 | 0.369 | 0.384 | 0.387 | 0.360 | 0.365 | 0.367 | 0.356 | 0.364 | 0.383 | 0.661 | 0.373 | 0.749 | 0.375 |       |       |       |       |       |       |
| 26     | 0.700                              | 0.376 | 0.357 | 0.963 | 0.372 | 0.674 | 0.358 | 0.363 | 0.355 | 0.345 | 0.349 | 0.350 | 0.364 | 0.366 | 0.339 | 0.354 | 0.354 | 0.346 | 0.353 | 0.371 | 0.655 | 0.363 | 0.739 | 0.367 | 0.105 |       |       |       |       |       |
| 27     | 0.449                              | 0.186 | 0.150 | 0.579 | 0.161 | 0.408 | 0.154 | 0.159 | 0.152 | 0.152 | 0.159 | 0.150 | 0.210 | 0.225 | 0.146 | 0.145 | 0.162 | 0.146 | 0.152 | 0.159 | 0.362 | 0.159 | 0.957 | 0.144 | 0.363 | 0.311 |       |       |       |       |
| 28     | 0.460                              | 0.167 | 0.125 | 0.564 | 0.126 | 0.368 | 0.120 | 0.127 | 0.122 | 0.129 | 0.143 | 0.109 | 0.164 | 0.184 | 0.122 | 0.115 | 0.131 | 0.121 | 0.120 | 0.116 | 0.317 | 0.097 | 0.916 | 0.116 | 0.361 | 0.350 | 0.146 |       |       |       |
| 29     | 0.527                              | 0.289 | 0.272 | 0.554 | 0.268 | 0.305 | 0.274 | 0.282 | 0.273 | 0.275 | 0.273 | 0.262 | 0.268 | 0.282 | 0.253 | 0.259 | 0.278 | 0.267 | 0.272 | 0.240 | 0.357 | 0.265 | 0.861 | 0.234 | 0.515 | 0.524 | 0.299 | 0.245 |       |       |
| 30     | 0.186                              | 0.519 | 0.499 | 0.392 | 0.503 | 0.555 | 0.493 | 0.508 | 0.502 | 0.508 | 0.508 | 0.495 | 0.510 | 0.526 | 0.492 | 0.498 | 0.517 | 0.507 | 0.495 | 0.521 | 0.536 | 0.515 | 0.457 | 0.499 | 0.614 | 0.607 | 0.496 | 0.489 | 0.475 |       |
| 31     | 0.195                              | 0.524 | 0.505 | 0.483 | 0.513 | 0.567 | 0.503 | 0.512 | 0.498 | 0.493 | 0.512 | 0.497 | 0.513 | 0.526 | 0.486 | 0.505 | 0.515 | 0.508 | 0.500 | 0.520 | 0.551 | 0.522 | 0.548 | 0.507 | 0.607 | 0.605 | 0.498 | 0.493 | 0.545 | 0.108 |

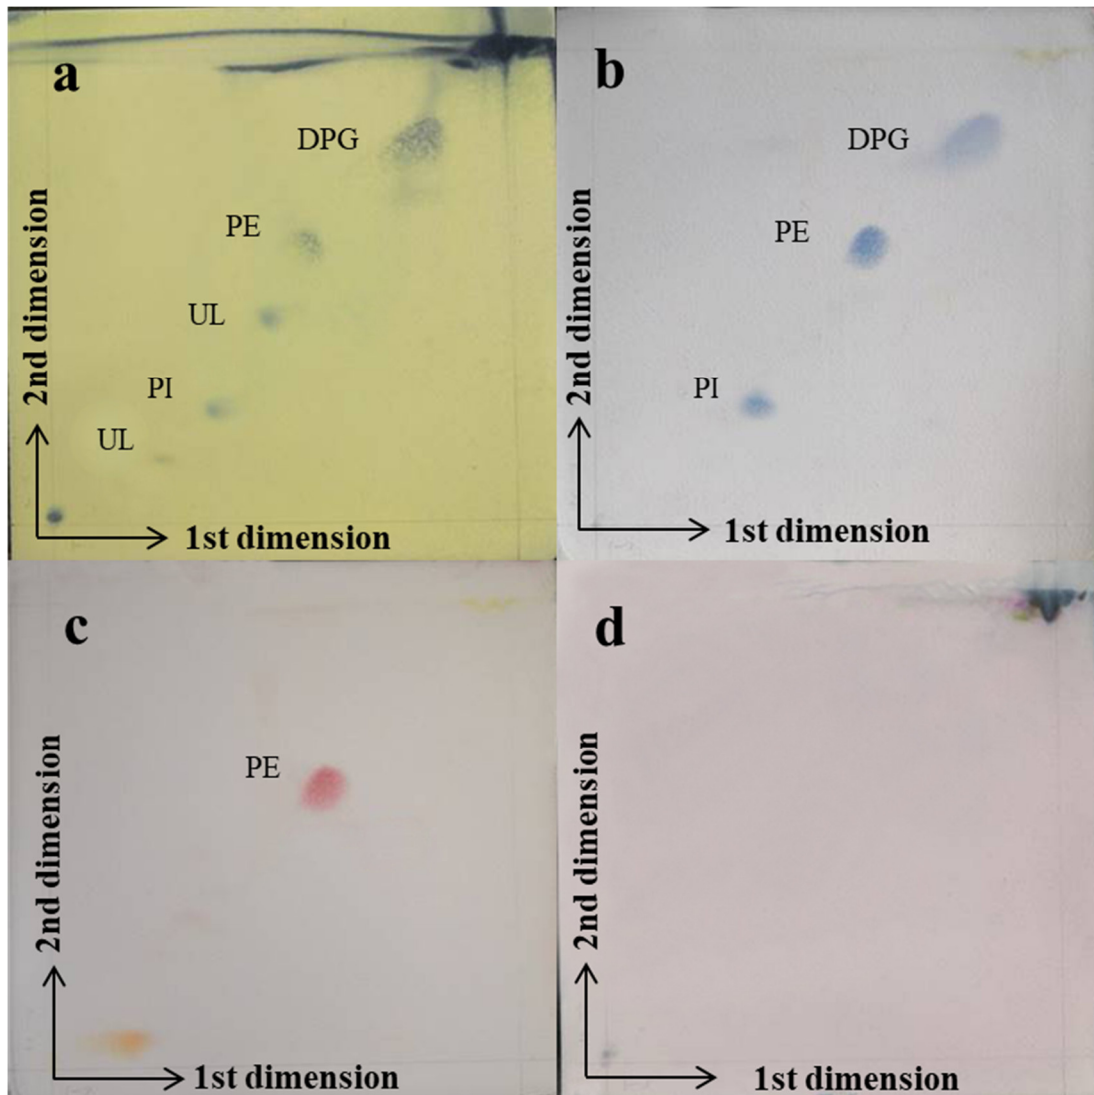

**Figure 1.** The polar lipids of strain NEAU-wh3-1. a, using molybdophosphoric acid reagent; b, molybdenum blue reagent; c, using ninhydrin reagent, d, using anisaldehyde reagent. Diphenylphosphorylcholine (DPG), phosphatidylethanolamine (PE), phosphatidylinositol (PI), and unidentified lipid (UL); 1st dimension: chloroform: methanol: water (65: 25: 4, v/v); 2nd dimension: chloroform: acetic acid: methanol: water (80: 18: 12: 5, v/v).

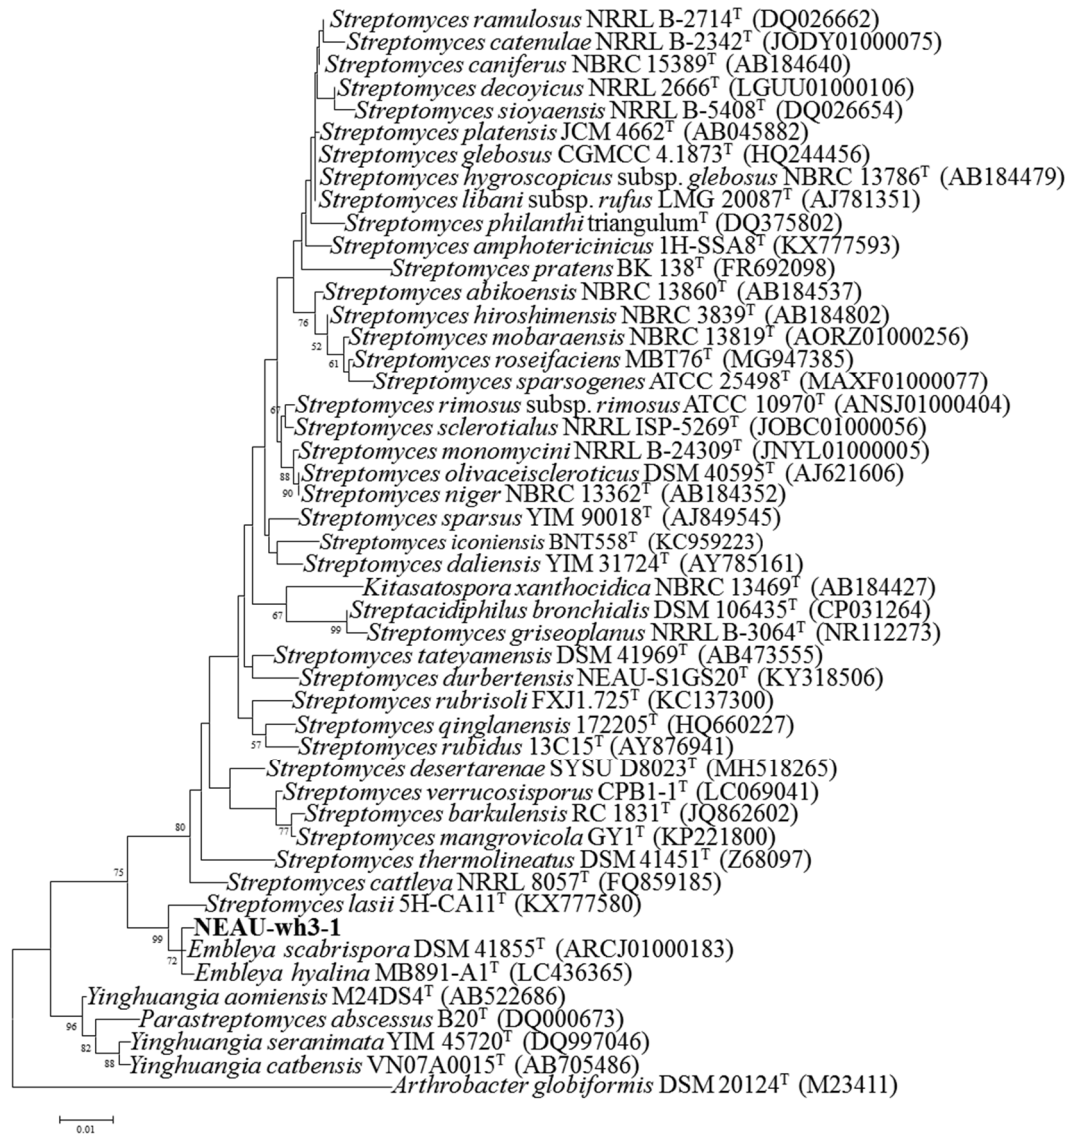

**Figure S2.** Maximum-likelihood tree based on 16S rRNA gene sequences showing relationship between strain NEAU-wh3-1 and related taxa based on 16S rRNA gene sequences. Only bootstrap values above 50 % (percentages of 1000 replications) are indicated. *Arthrobacter globiformis* DSM 20124<sup>T</sup> (M23411) was used as an outgroup. Bar, 0.01 substitutions per nucleotide position.

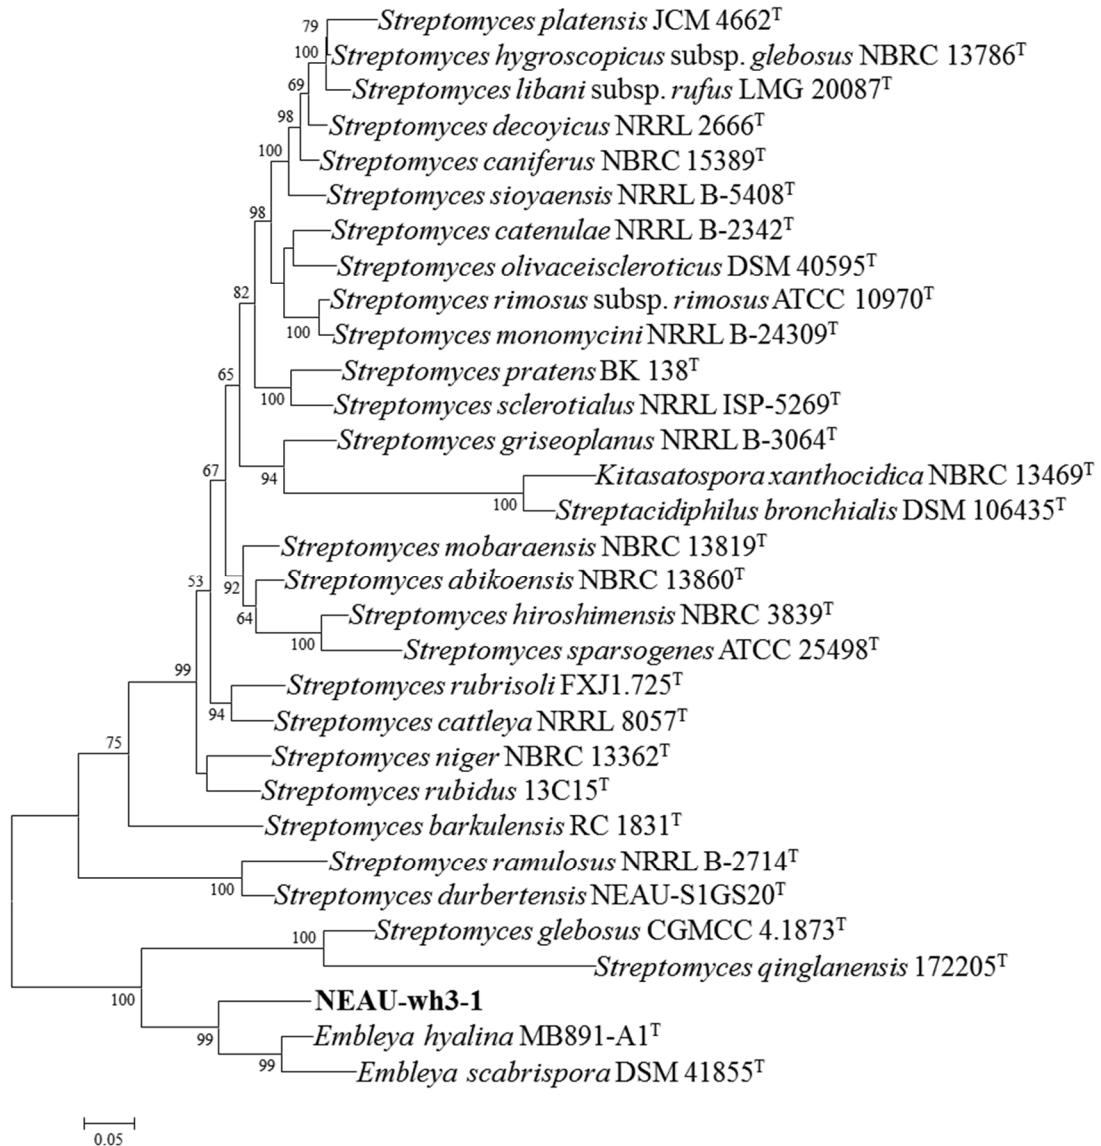

**Figure S3** Maximum-likelihood tree based on multilocus sequence analysis (MLSA) analysis of the concatenated partial sequences (1979 bp) from five housekeeping genes (*atpD*, *gyrB*, *recA*, *rpoB*, and *trpB*) of strain NEAU-wh3-1 (in bold) with related taxa. Only bootstrap values above 50% (percentages of 1000 replications) are indicated. Bar, 0.05 substitutions per nucleotide position.

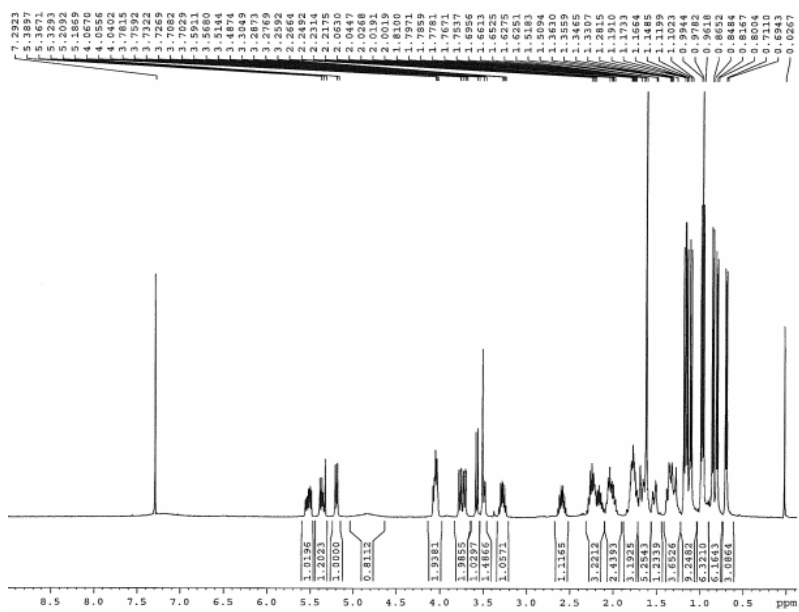

Figure S4.  $^1\text{H}$  NMR (400 MHz) spectrum of compound **1** in  $\text{CDCl}_3$

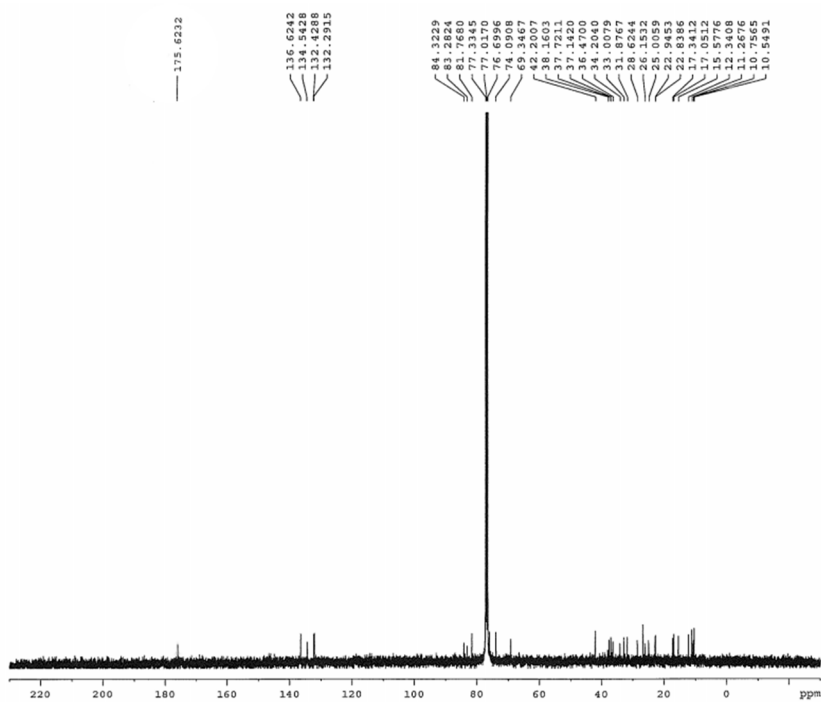

Figure S5.  $^{13}\text{C}$  NMR (150 MHz) spectrum of compound **1** (in  $\text{CDCl}_3$ )

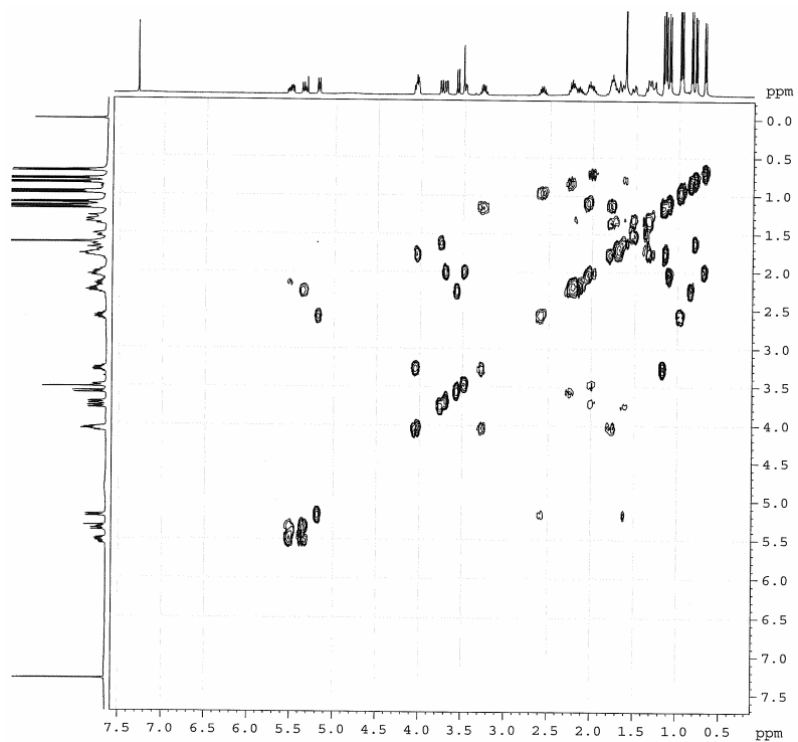

Figure S6.  $^1\text{H}$ - $^1\text{H}$  COSY spectrum (400 MHz) of compound **1** (in  $\text{CDCl}_3$ )

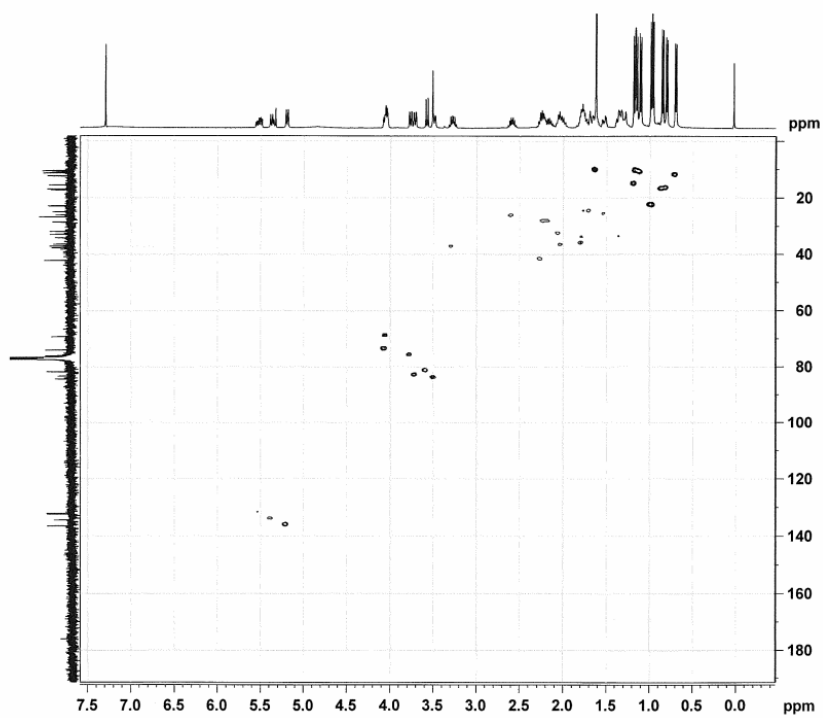

Figure S7. HSQC spectrum (400 MHz) of compound **1** (in  $\text{CDCl}_3$ )



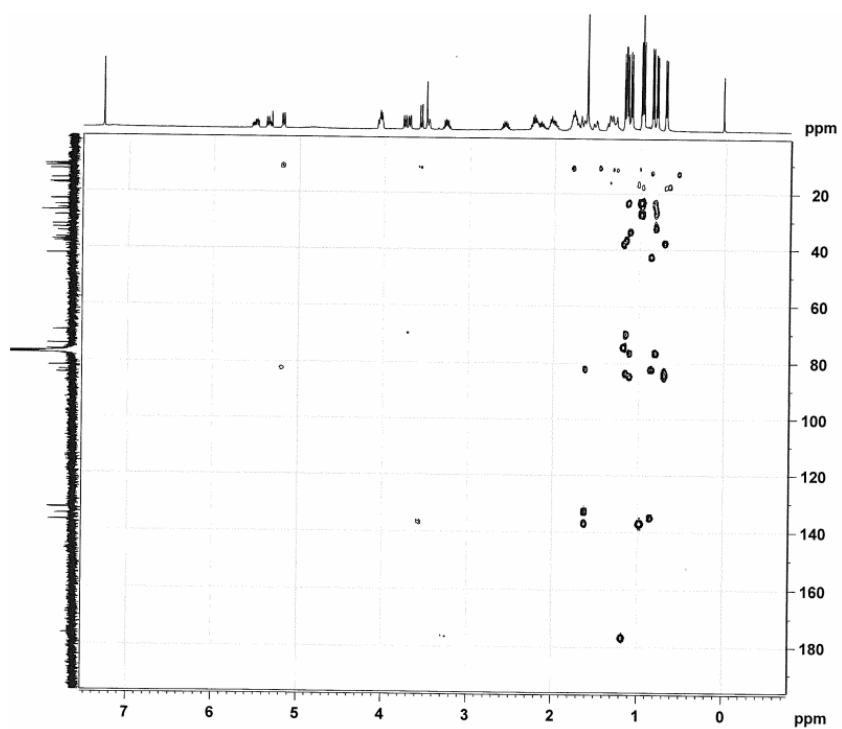

Figure S8. HMBC spectrum (400 MHz) of compound 1 (in CDCl<sub>3</sub>)

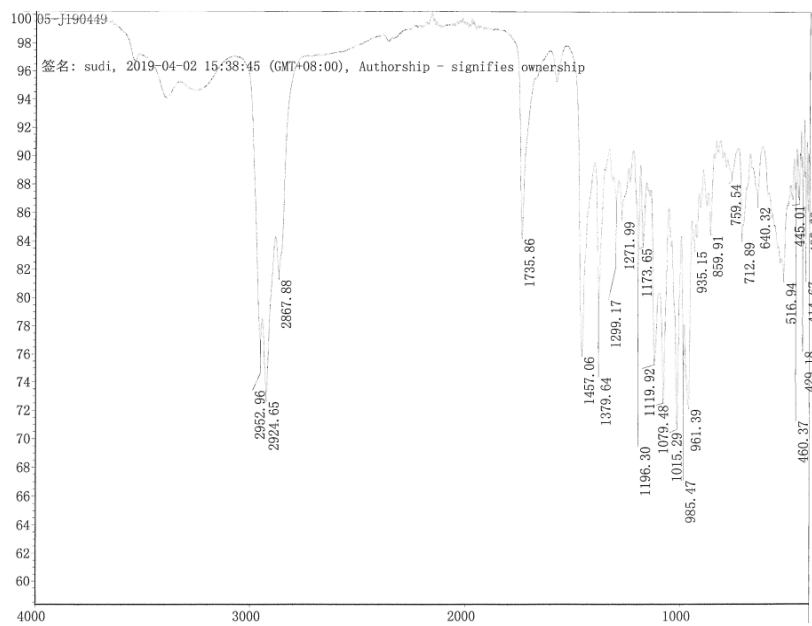

Figure S9. IR spectrum of compound 1 (in EtOH)

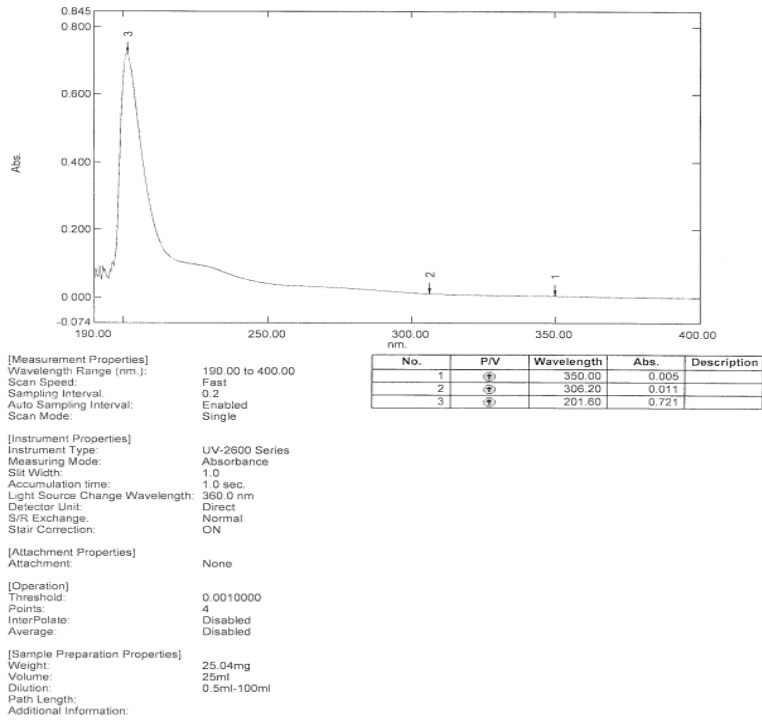

**Figure S10.** UV spectrum of compound **1** (in EtOH)

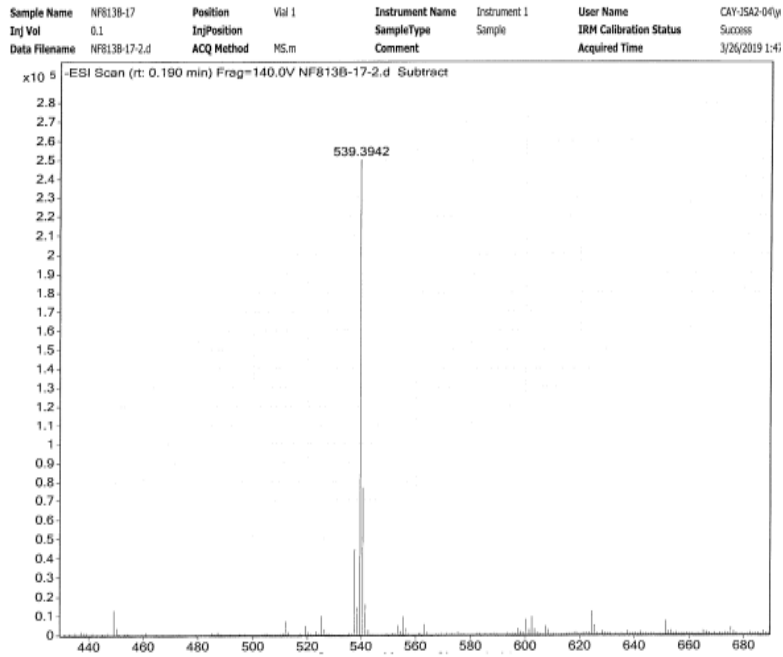

**Figure S11.** The HRESIMS spectrum of compound **1**

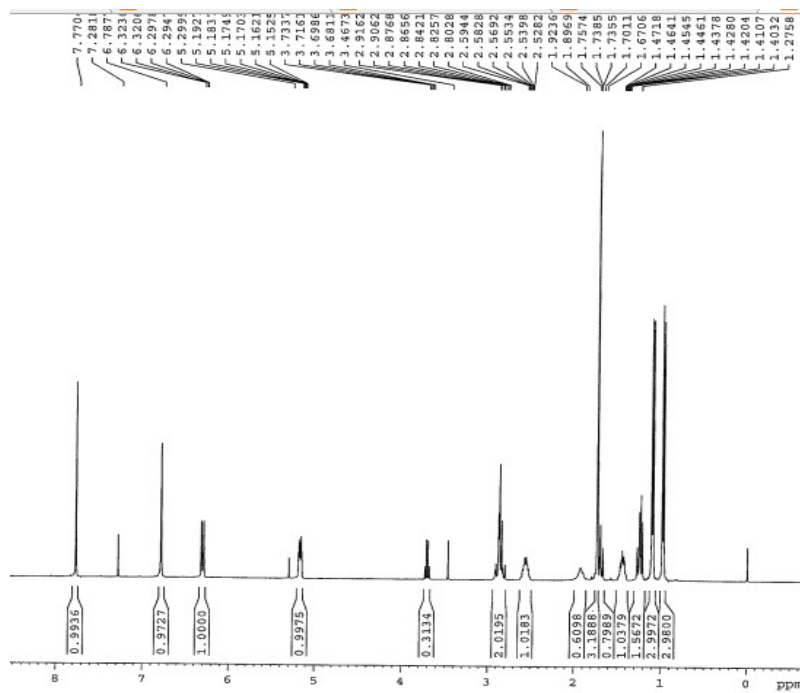

Figure S12.  $^1\text{H}$  NMR (400 MHz) spectrum of compound **2** in  $\text{CDCl}_3$

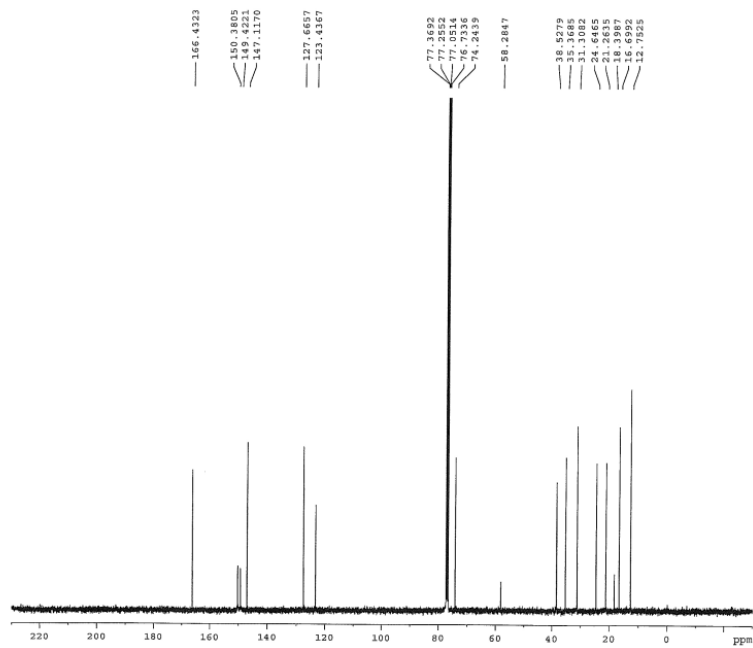

Figure S13.  $^{13}\text{C}$  NMR (150 MHz) spectrum of compound **2** in  $\text{CDCl}_3$

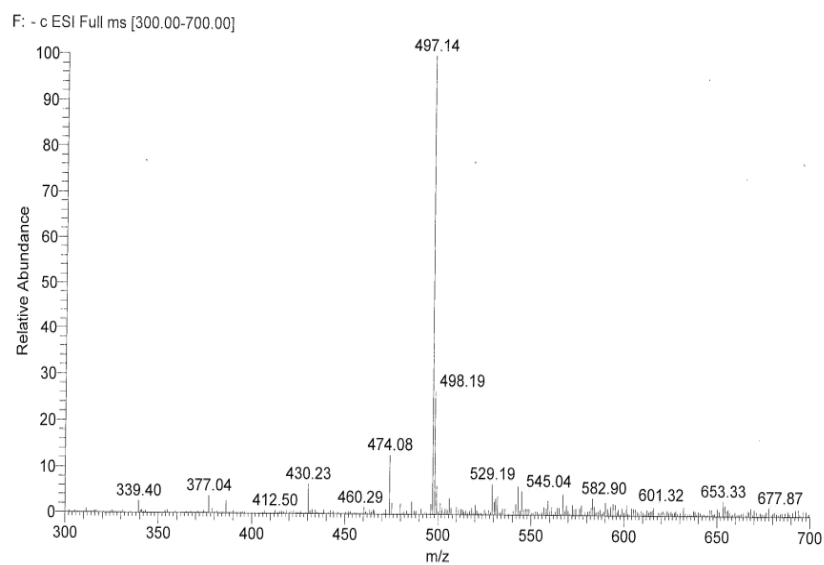

Figure S14. The ESI-MS spectrum of compound 2

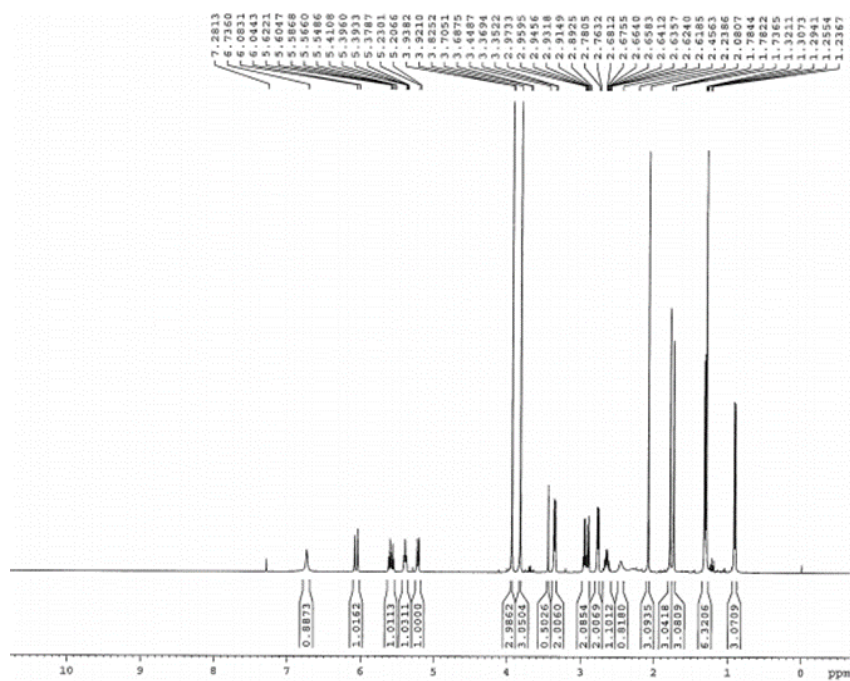

Figure S15. <sup>1</sup>H NMR (400 MHz) spectrum of compound 3 in CDCl<sub>3</sub>

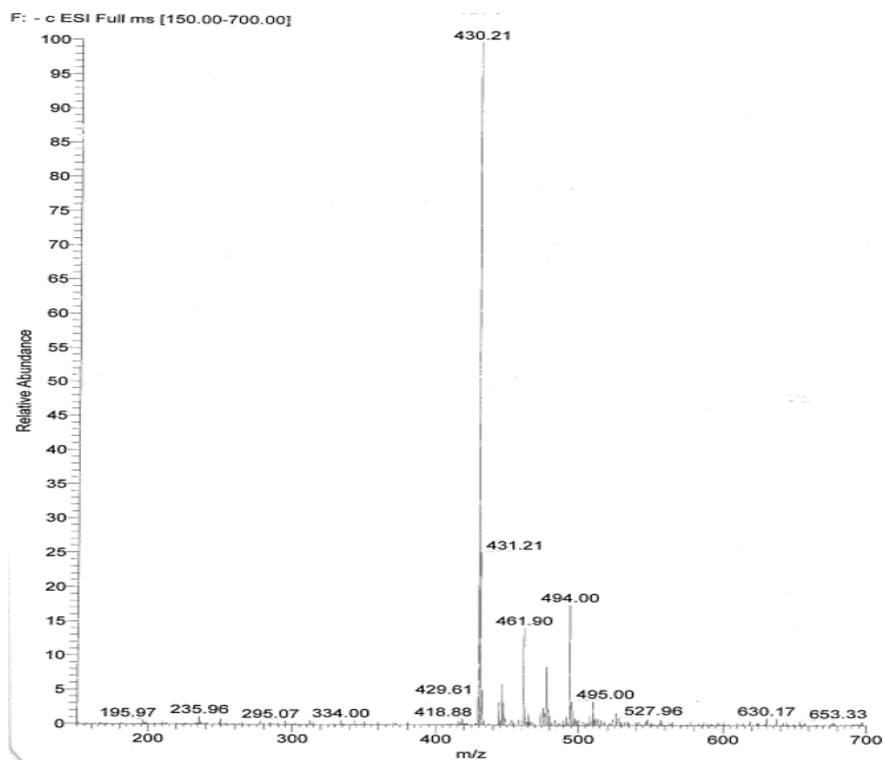

Figure S16. The ESI-MS spectrum of compound 3

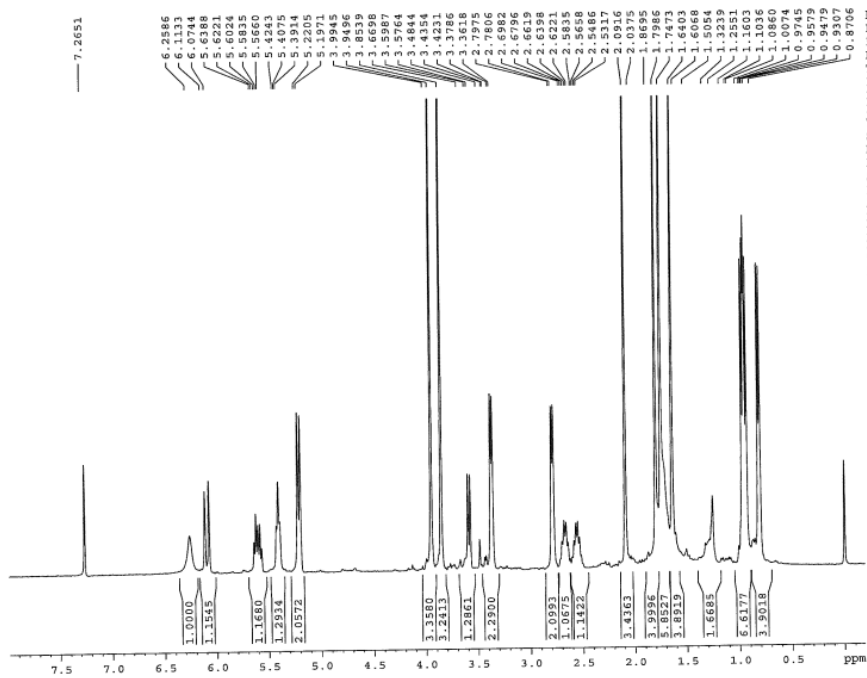

Figure S17. <sup>1</sup>H NMR (400 MHz) spectrum of compound 4 in CDCl<sub>3</sub>

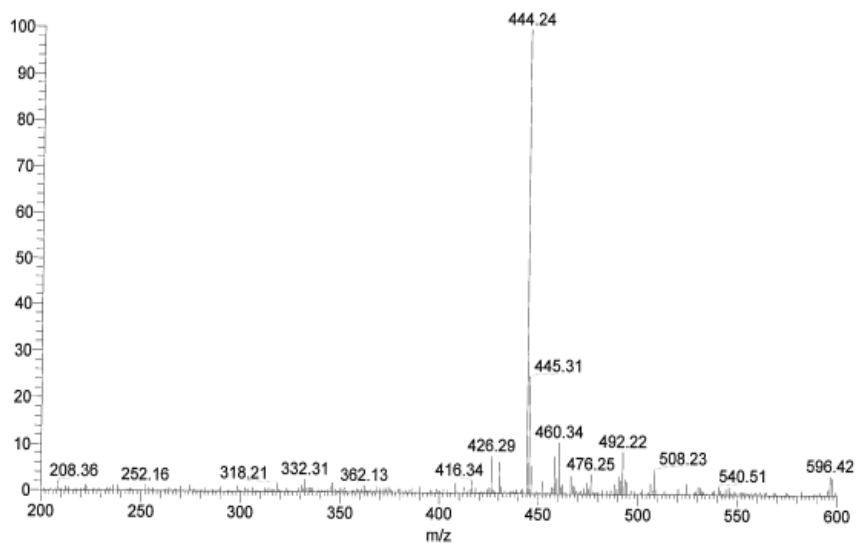

Figure S18. The ESI-MS spectrum of compound 4

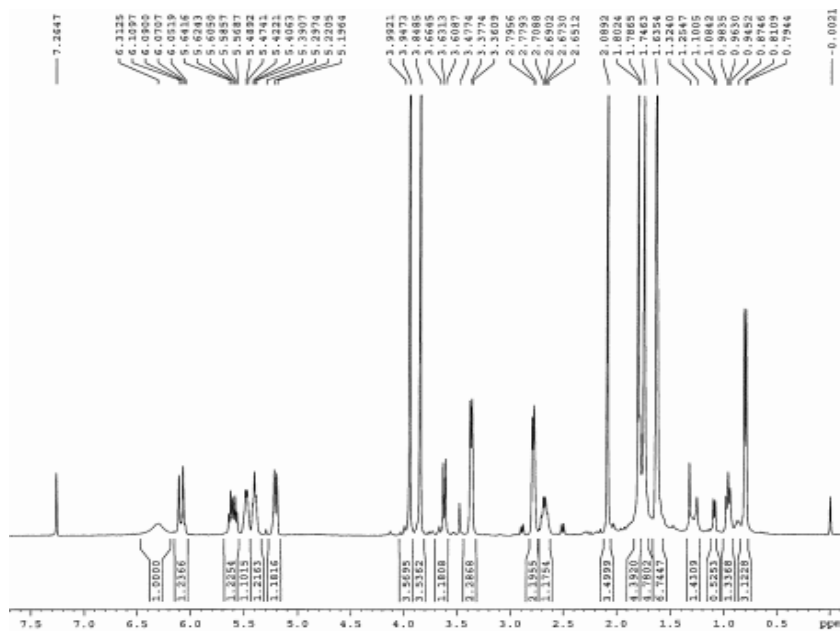

Figure S19. <sup>1</sup>H NMR (400 MHz) spectrum of compound 5 in CDCl<sub>3</sub>

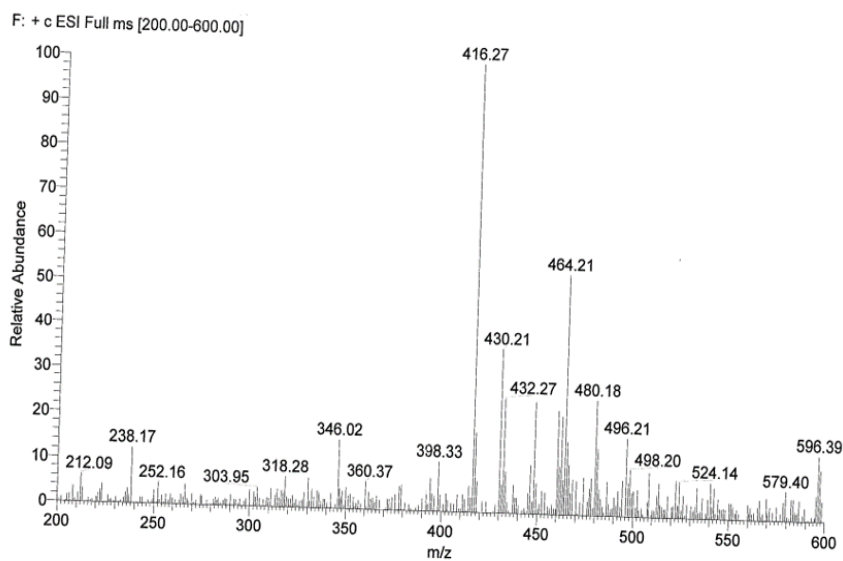

Figure S20. The ESI-MS spectrum of compound 5

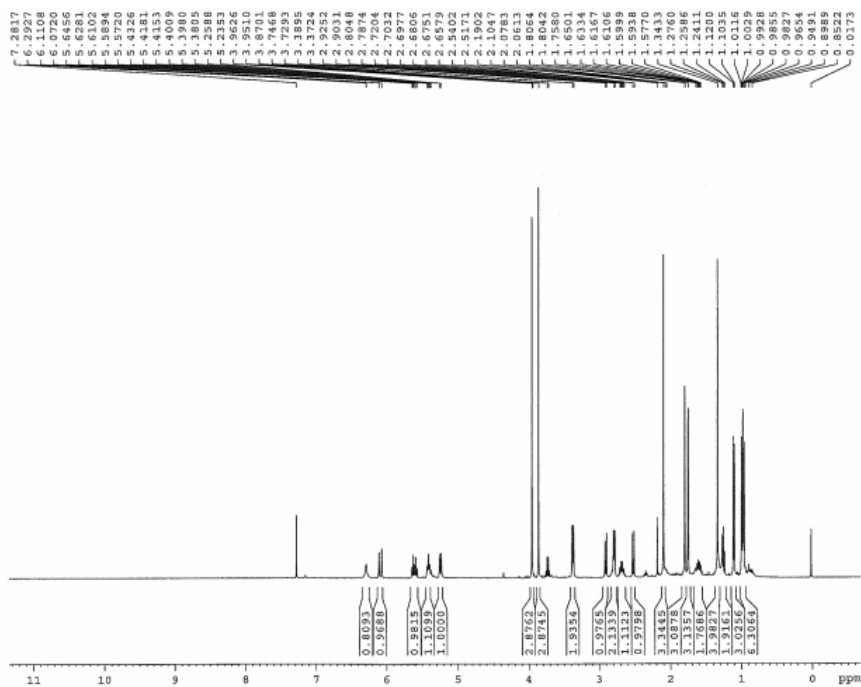

Figure S21. <sup>1</sup>H NMR (400 MHz) spectrum of compound 6 in CDCl<sub>3</sub>

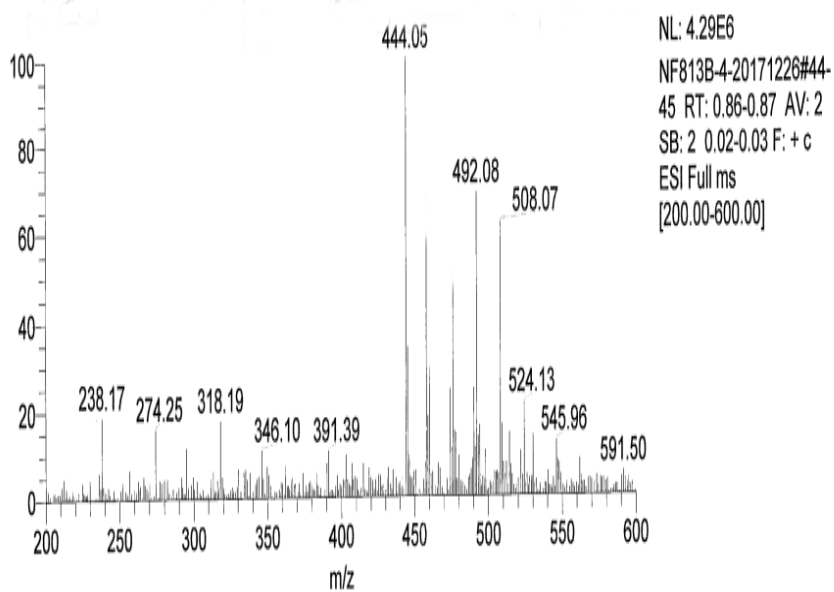

Figure S22. The ESI-MS spectrum of compound 6

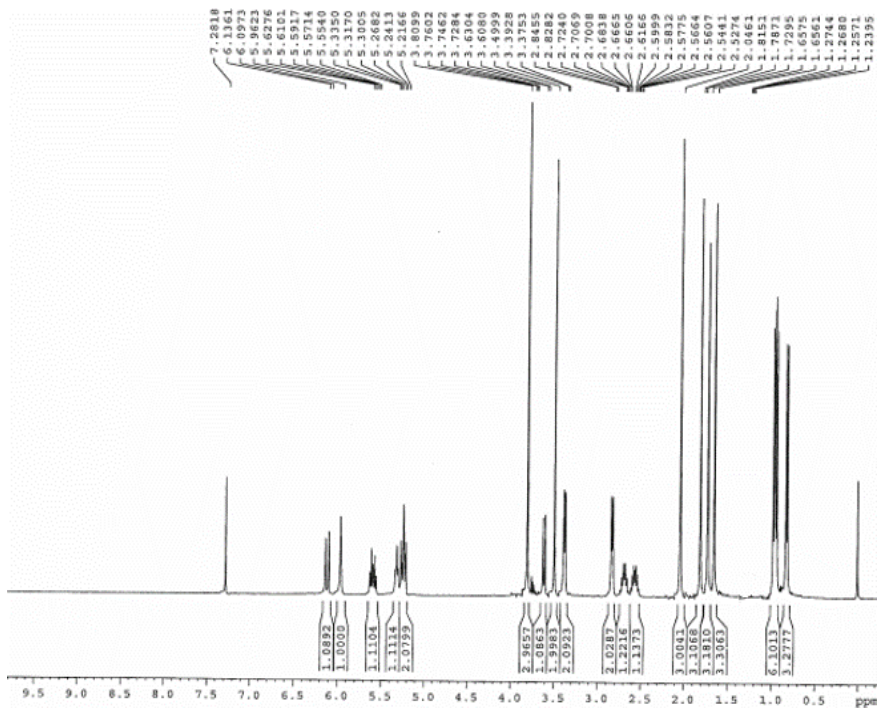

Figure S23. <sup>1</sup>H NMR (400 MHz) spectrum of compound 7 in CDCl<sub>3</sub>



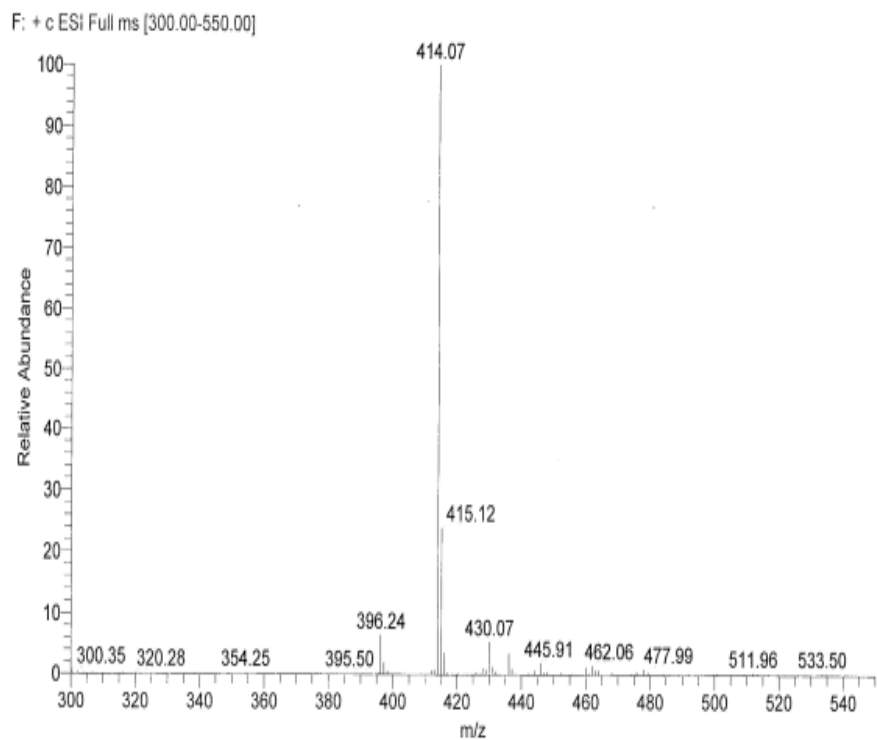

Figure S24. ESI-MS spectrum of compound of compound 7

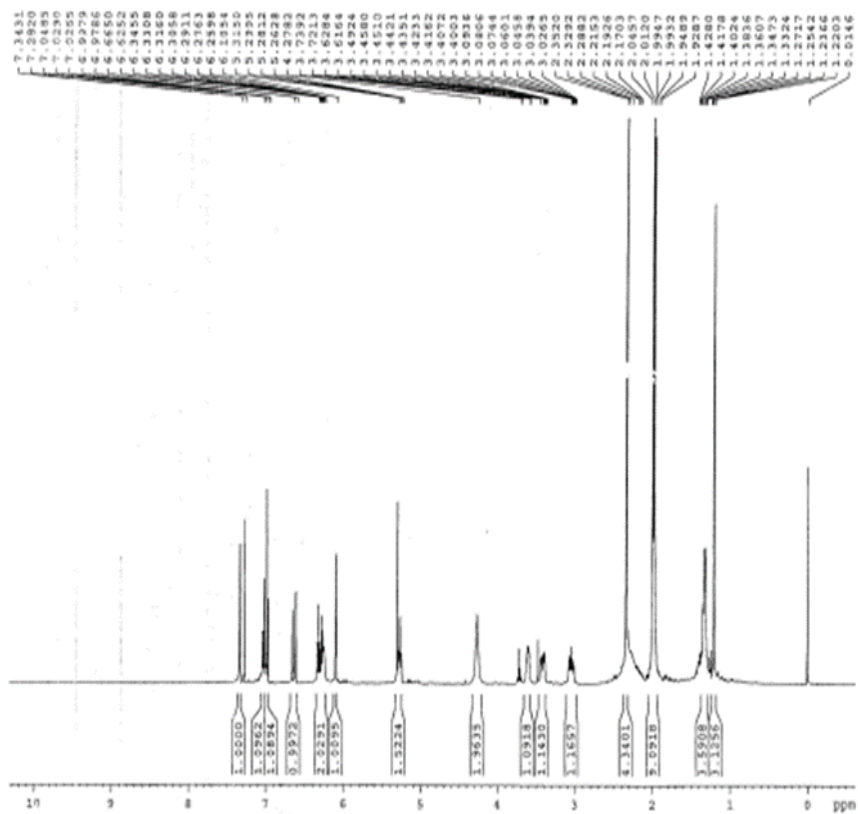

Figure S25. <sup>1</sup>H NMR (400 MHz) spectrum of compound 8 in CDCl<sub>3</sub>

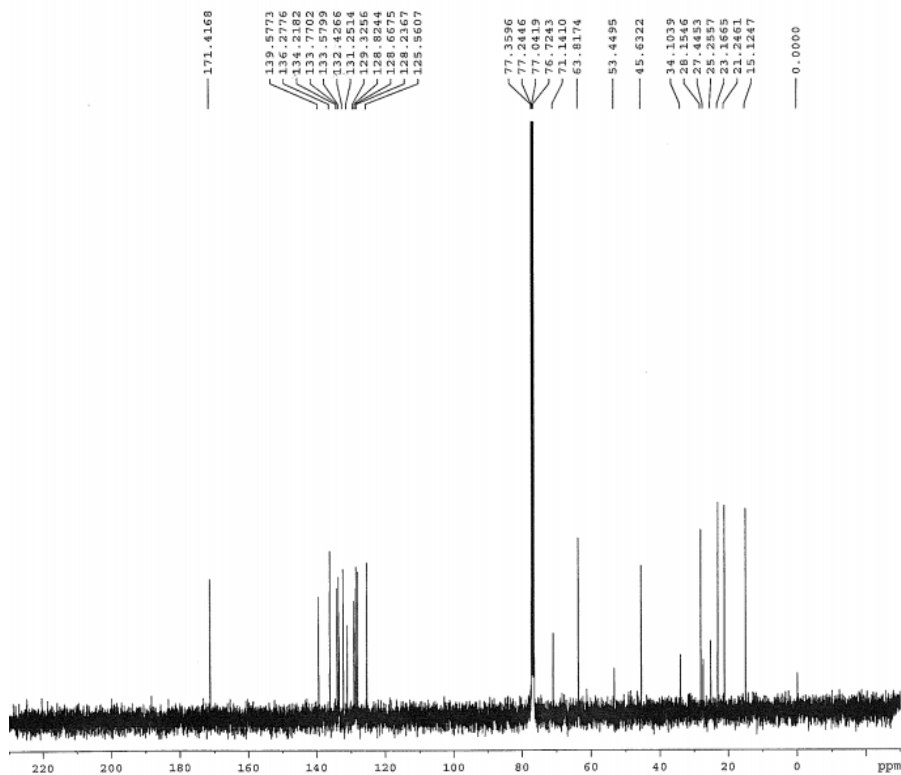

Figure S26.  $^{13}\text{C}$  NMR (150 MHz) spectrum of compound **8** in  $\text{CDCl}_3$

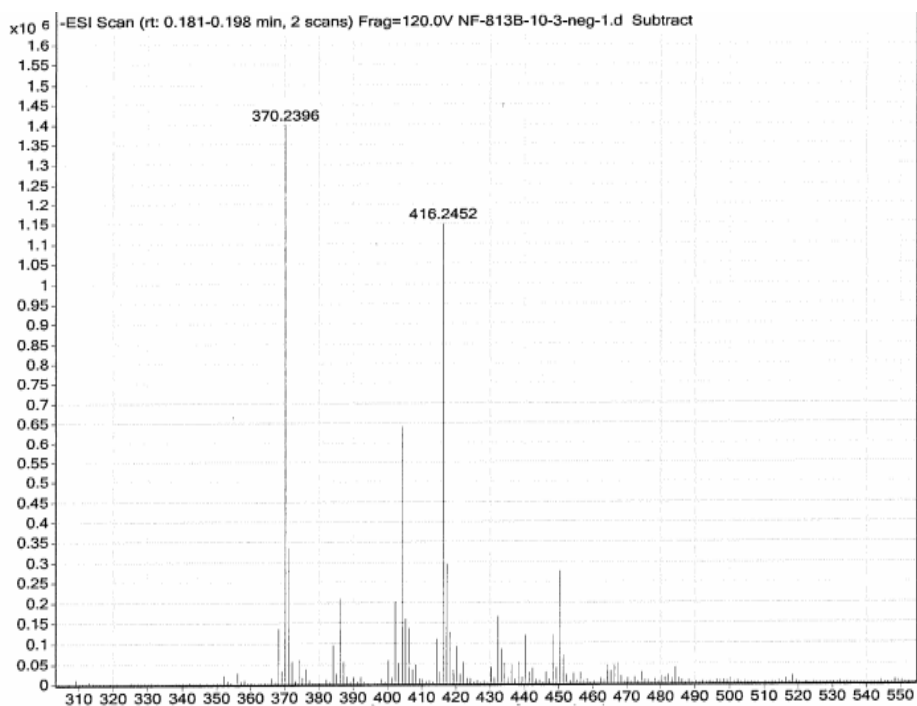

Figure S27. The HRESIMS spectrum of compound **8**
